# Supplementary material for: Selection, biophysical and structural analysis of synthetic nanobodies that effectively neutralize SARS-CoV-2
Source: PubMed Central journal article supplement (PMC7642358; doi:10.1038/s41467-020-19204-y), 2020-11-04
Supplement: 41467_2020_19204_MOESM3_ESM.pdf [file 41467_2020_19204_MOESM3_ESM.pdf]

### **Description of Additional Supplementary Files**

File Name: Supplementary Data 1

Description: List of sybody sequences
