# Supplementary material for: Selection, biophysical and structural analysis of synthetic nanobodies that effectively neutralize SARS-CoV-2
Source: PubMed Central journal article supplement (PMC7642358; doi:10.1038/s41467-020-19204-y), 2020-11-04
Supplement: 41467_2020_19204_MOESM4_ESM.pdf [file 41467_2020_19204_MOESM4_ESM.pdf]

| Sybody | Sequence                                                                                                                 |
|--------|--------------------------------------------------------------------------------------------------------------------------|
| 1      | QVQLVESGGGLVQAGGSLRLSCAASGFPVNTSEMAWYRQAPGKEREWVAAIESSGDETYADSVKGRFTISR<br>NAKNTVYLLQMNSLKPEDTAVYYCYVYVGGSYLGQGTQVTVS    |
| 2      | QVQLVESGGGLVQAGGSLRLSCAASGFPVSNEEMTWYRQAPGKEREWVAAIASNGNQTEYADSVKGRFTISR<br>DNAKNTVYLLQMNSLKPEDTAVYYCYVYVGGASYIGQGTQVTVS |
| 3      | QVQLVESGGGLVQAGGSLRLSCAASGFPVSHTEMTWYRQAPGKEREWVAAIESQGVYTHYADSVKGRFTISR<br>NAKNTVYLLQMNSLKPDDTAVYYCYVYVGGGYIGQGTQVTVS   |
| 4      | QVQLVESGGGLVQAGGSLRLSCAASGFPVNGFNMEWYRQAPGKEREWVAAITSEGNYTYADSVKGRFTISR<br>NAKNTVYLLQMNSLKPEDTAVYYCYVYVGGQSYIGQGTQVTVS   |
| 5      | QVQLVESGGGLVQAGGSLRLSCAASGFPVAQQEMTWYRQAPGKEREWVAAISSIGSITHYADSVKGRFTISR<br>NAKNTVYLLQMNSLKPEDTAVYYCYVYVGGASYIGQGTQVTVS  |
| 6      | QVQLVESGGGLVQAGGSLRLSCAASGFPVNHTRMYWYRQAPGKEREWVAAIQSHGQNTFYADSVKGRFTISR<br>DNAKNTVYLLQMNSLKPEDTAVYYCYVWVGNQYWGQGTQVTVS  |
| 7      | QVQLVESGGGLVQAGGSLRLSCAASGFPVNAEMEYRQAPGKEREWVAAISSSGDWTYYADSVKGRFTISR<br>DNAKNTVYLLQMNSLKPEDTAVYYCLVYVGGSTYIGQGTQVTVS   |
| 8      | QVQLVESGGGLVQAGGSLRLSCAASGFPVKSYLEMEWYRQAPGKEREWVAAISSYGEYTEYADSVKGRFTISR<br>DNAKNTVYLLQMNSLKPEDTAVYYCYVWVGDSYLGQGTQVTVS |
| 9      | QVQLVESGGGLVQAGGSLRLSCAASGFPVQGHMYWYRQAPGKEREWVAAIYSYGHITKYADSVKGRFTISR<br>NAKNTVYLLQMNSLKPEDTAVYYCWVYVGGDYEGQGTQVTVS    |
| 10     | QVQLVESGGGLVQAGGSLRLSCAASGFPVESAEMEYRQAPGKEREWVAAITSQGTITEYADSVKGRFTISR<br>DNAKNTVYLLQMNSLKPEDTAVYYCYVYVGGASYIGQGTQVTVS  |
| 11     | QVQLVESGGGLVQAGGSLRLSCAASGFPVRTENMHWYRQAPGKEREWVAAIYSFGATMLYADSVKGRFTISR<br>NAKNTVYLLQMNSLKPEDTAVYYCAVNVGEWYEGQGTQVTVS   |
| 12     | QVQLVESGGGLVQAGGSLRLSCAASGFPVQLYWMEWYRQAPGKEREWVAAITSDGDYTEYADSVKGRFTISR<br>DNAKNTVYLLQMNSLKPEDTAVYYCYVKGWYEGYQGTQVTVS   |
| 13     | QVQLVESGGGLVQAGGSLRLSCAASGFPVENYYMRWYRQAPGKEREWVAAIESSGAETRYADSVKGRFTISR<br>NAKNTVYLLQMNSLKPEDTAVYYCYVYVGGWGYAGQGTQVTVS  |
| 14     | QVQLVESGGGLVQAGGSLRLSCAASGFPVATAEMVWYRQAPGKEREWVAAIMSAGQTEYADSVKGRFTISR<br>DNAKNTVYLLQMNSLKPEDTAVYYCYVWVGKSYIGQGTQVTVS   |
| 15     | QVQLVESGGGLVQAGGSLRLSCAASGFPVYEHYMRWYRQAPGKEREWVAAIQSHGNHTAYADSVKGRFTISR<br>DNAKNTVYLLQMNSLKPEDTAVYYCFVYVGGNGYTGQGTQVTVS |
| 16     | QVQLVESGGGLVQAGGSLRLSCAASGFPVASQEMTWYRQAPGKEREWVAAISSGRQTEYADSVKGRFTISR<br>NAKNTVYLLQMNSLKPEDTAVYYCYVYVGGSYIGQGTQVTVS    |
| 17     | QVQLVESGGGLVQAGGSLRLSCAASGFPVKASEMEWYRQAPGKEREWVAAIASIGYNTYYADSVKGRFTISR<br>NAKNTVYLLQMNSLKPEDTAVYYCLVYVGGATYIGQGTQVTVS  |

|    |                                                                                                                              |
|----|------------------------------------------------------------------------------------------------------------------------------|
| 18 | QVQLVESGGGLVQAGGSLRLSCAASGFPVDYKSMWWRQAPGKEREWVA/AIDSAGDTTTYADSVKGRFTISR<br>DNAKNTVYLQMNSLKPEDTAVYYCTVWVGTTYTGQGTQVTVS       |
| 19 | QVQLVESGGGLVQAGGSLRLSCAASGFPVYNEEMTWYRQAPGKEREWVA/IASYGRLTEYADSVKGRFTISR<br>DNAKNTVYLQMNSLKPEDTAVYYCYVYVVGQSYIGQGTQVTVS      |
| 21 | QVQLVESGGGLVQAGGSLRLSCAASGFPVKESEMTWYRQARGKEREWVA/INSHGMTTHYADSVKGRFTISR<br>DNAKNTVYLQMNSLKPEDTAVYYCYVYVVGGSYIGQGTQVTVS      |
| 22 | QVQLVESGGGLVQAGGSLRLSCAASGFPVNHYEMEWYRQAPGREREWVA/IMDSTGYETAYADSVKGRFTISR<br>RDNKNTVYLQMNSLKPEDTAVYYCYVYVVGASYIGQGTQVTVS     |
| 23 | QVQLVESGGGLVQAGGSLRLSCAASGFPVESENMHWYRQAPGKEREWVA/IYSTGGWTLYADSVKGRFTISR<br>DNAKNTVYLQMNSLKPEDTAVYYCAVQVGYWYEGQGTQVTVS       |
| 24 | QVQLVESGGGLVQAGGSLRLSCAASGFPVSTAEMEWYRQAPGKEREWVA/ISSSGTWTTYADSVKGRFTISR<br>DNAKNTVYLQMNSLKPEDTAVYYCYVWVGSSYLGQGTQVTVS       |
| 25 | QVQLVESGGGLVQAGGSLRLSCAASGFPVESTMTWYRQAPGKEREWVA/IESEGHGTEYADSVKGRFTISR<br>DNAKNTVYLQMNSLKPEDTAVYYCYVYVVGAGYIGQGTQVTVS       |
| 26 | QVQLVESGGGLVQAGGSLRLSCAASGFPVQENMHYRQAPGKEREWVA/ISYGNFTLYADSVKGRFTISR<br>DNAKNTVYLQMNSLKPEDTAVYYCEVXVGVWYAGLGTQVTVS          |
| 27 | QVQLVESGGGLVQAGGSLRLSCAASGFPVKAEMVWYRQAPGKEREWVA/ILSQGHATEYADSVKGRFTISR<br>DNAKNTVYLQMNSLKPEDTAVYYCYVWVGRSYIGQGTQVTVS        |
| 28 | QVQLVESGGGLVQAGGSLRLSCAASGFPVYSAEMEWYRQAPGKEREWVA/ISSYGTNTYYADSVKGRFTISR<br>DNAKNTVYLQMNSLKPEDTAVYYCYVYVVGSSYIGQGTQVTVS      |
| 29 | QVQLVESGGGLVQAGGSLRLSCAASGFPVHYTYMRWYRQAPGKEREWVA/IKSYGQHTTYADSVKGRFTISR<br>DNAKNTVYLQMNSLKPEDTAVYYCEVGETYRGQGTQVTVS         |
| 30 | QVQLVESGGGLVQAGGSLRLSCAASGFPVWYKEMEWYRQAPGKEREWVA/ITSAGHHTTYADSVKGRFTISR<br>DNAKNTVYLQMNSLKPEDTAVYYCYVYVVGESYIGQGTQVTVS      |
| 31 | QVQLVESGGGLVQAGGSLRLSCAASGFPVWSAEMTWYRQAPGKEREWVA/INSHGRITEYADSVKGRFTISR<br>DNAKNTVYLQMNSLKPEDTAVYYCYVYVVGKSYIGQGTQVTVS      |
| 32 | QVQLVESGGGLVQAGGSLRLSCAASGFPVAHKSMWWRQAPGKEREWVA/IESTGDTTRYADSVKGRFTISR<br>DNAKNTVYLQMNSLKPEDTAVYYCVWVWGEVYRGQGTQVTVS        |
| 33 | QVQLVESGGGLVQAGGSLRLSCAASGFPVKTAEMEWYRQAPGKEREWVA/ISSTGKSTFYADSVKGRFTISR<br>DNAKNTVYLQMNSLKPEDTAVYYCHVYVGRTYIGQGTQVTVS       |
| 34 | QVQLVESGGGLVQAGGSLRLSCAASGFPVAYYEMEWYRQAPGKEREWVA/ITSSGVSTYYADSVKGRFTISR<br>DNAKNTVYLQMNSLKPEDTAVYYCYVYVVGXXYIGQGTQVTVS      |
| 35 | QVQLVESGGGLVQAGGSLRLSCAASGFPVNYTIMFWYRQAPGKEREWVA/IKSTGEHTLYADSVKGRFTISR<br>DNAKNTVYLQMNSLKPEDTAVYYCNVKDAGQGWQEYDYWGQGTQVTVS |
| 36 | QVQLVESGGGLVQAGGSLRLSCAASGFPVEWKHMTWYRQAPGKEREWVA/IASTGAYTHYADSVKGRFTISR<br>DNAKNTVYLQMNSLKPEDTAVYYCNVKDWGSKTTYDYWGQGTQVTVS  |

|    |                                                                                                                                |
|----|--------------------------------------------------------------------------------------------------------------------------------|
| 37 | QVQLVESGGGLVQAGGSLRLSCAASGFPVYNTWMEWYRQAPGKEREWVAAITSYGFHTYYADSVKGRFTISR<br>NAKNTVYLLQMNSLKPEDTAVYYCNVKDEGNTTAYDYWGQGTQVTVS    |
| 38 | QVQLVESGGGLVQAGGSLRLSCAASGFPVYWAHMTWYRQAPGKEREWVAAIVSSGAYTAYADSVKGRFTISR<br>DNAKNTVYLLQMNSLKPEDTAVYYCNVKDFGTQEHHYDYWGQGTQVTVS  |
| 39 | QVQLVESGGGPVQAGGSLRLSCAASGFPVMWSMHMWYRQAPGKEREWVAAIVSYGAYTIYADSVKGRFTISR<br>DNAKNTVYLLQMNSLKPEDTAVYYCNVKDFGGYRYDYWGQGTQVTVS    |
| 40 | QVQLVESGGGLVQAGGSLRLSCAASGFPVQGTWMEWYRQAPGKEREWVAAITSVGYRTYYADSVKGRFTISR<br>DNAKNTVYLLQMNSLKPEDTAVYYCNVKDEGAIKNDYWGQGTQVTVS    |
| 41 | QVQLVESGGGLVQAGGSLRLSCAASGFPVEHQHMHMWYRQAPGKEREWVAAIVSTGHYTIYADSVKGRFTISR<br>NAKNTVYLLQMNSLKPEDTAVYYCNVKDWGDTSQYYDYWGQGTQVTVS  |
| 42 | QVQLVESGGGLVQAGGSLRLSCAASGFPVYNTWMEWYRQAPGKEREWVAAITSWGFKTYADSVKGRFTISR<br>DNAKNTVYLLQMNSLKPEDTAVYYCNVKDEGYTGYDYWGQGTQVTVS     |
| 43 | QVQLVESGGGLVQAGGSLRLSCAASGFPVEWTHMHMWYRQAPGKEREWVAAIASSGAYTVYADSVKGRFTISR<br>DNAKNTVYLLQMNSLKPEDTAVYYCNVKDWGSDRYDYWGQGTQVTVS   |
| 44 | QVQLVESGGGLVQAGGSLRLSCAASGFPVERKHMLWYRQSPGKEREWVAAIVSYGNYYTYADSVKGRFTISR<br>NAKNTVYLLQMNSLKPEDTAVYYCNVKDHGFNTVLYDYWGQGTQVTVS   |
| 45 | QVQLVESGGGLVQAGGSLRLSCAASGFPVAGTWMEWYRQAPGKEREWVAAITSYGYRTYYADSVKGRFTISR<br>NAKNTVYLLQMNSLKPEDTAVYYCNVKDEGKSSQVYDYWGQGTQVTVS   |
| 46 | QVQLVESGGGLVQAGGSLRLSCAASGFPVNYTIMFWYRKAPGKEREWVAAIKSHGATTLYADSVKGRFTISR<br>DNAKNTVYLLQMNSLKPEDTAVYYCNVKDVGNDQKSYDYWGQGTQVTVS  |
| 47 | QVQLVESGGGLVQAGGSLRLSCAASGFPVVAHMHMWYRQAPGKEREWVAAITSEGAHTIYADSVKGRFTISR<br>DNAKNTVYLLQMNSLKPEDTAVYYCNVKDWGTYSTYYDYWGQGTQVTVS  |
| 48 | QVQLVESGGGLVQAGGSLRLSCAASGFPVAHWWMWYRQAPGKEREWVAAIFSEGNWTHYADSVKGRFTISR<br>RDNAKNTVYLLQMNSLKPEDTAVYYCNVKDGTGATQFAYDYWGQGTQVTVS |
| 49 | QVQLVESGGGLVQAGGSLRLSCAASGFPVHYTHMHMWYRQAPGKEREWVAAIASSGAYTVYADSVKGRFTISR<br>NAKNTVYLLQMNSLKPEDTAVYYCNVKDWGTYNTYYDYWGQGTQVTVS  |
| 50 | QVQLVESGGGLVQAGGSLRLSCAASGFPVQYEHMHMWYRQAPGKEREWVAAIVSEGAYTHYADSVKGRFTISR<br>DNAKNTVYLLQMNSLKPEDTAVYYCNVKDWGWLQYDYWGQGTQVTVS   |
| 51 | QVQLVESGGGLVQAGGSLRLSCAASGFPVKETWMHWYRQAPGKEREWVAAITSFGYKTYADSVKGRFTISR<br>NAKNTVYLLQMNSLKPEDTAVYYCNVKDAGDVTHQYDYWGQGTQVTVS    |
| 52 | QVQLVESGGGLVQAGGSLRLSCAASGFPVYNWMEWYRQAPGKEREWVAAITSWGKYTYADSVKGRFTISR<br>DNAKNTVYLLQMNSLKPEDTAVYYCNVKDEGMWQHYYDYWGQGTQVTVS    |
| 53 | QVQLVESGGGLVQAGGSLRLSCAASGFPVYATVMHWYRQAPGKEREWVAAIYSTGMWTLYADSVKGRFTISR<br>DNAKNTVYLLQMNSLKPEDTAVYYCNVKDEGYDYDYWGQGTQVTVS     |
| 54 | QVQLVESGGGLVQAGGSLRLSCAASGFPVWNTWMEWYRQAPGKEREWVAAITSYGFKTYADSVKGRFTISR<br>DNAKNTVYLLQMNSLKPEDTAVYYCNVKDEGNSQSHYDYWGQGTQVTVS   |

|    |                                                                                                                                   |
|----|-----------------------------------------------------------------------------------------------------------------------------------|
| 56 | QVQLVESGGGLVQAGGSLRLSCAASGFPVEMWSMEWYRQAPGKEREWVAAIMSFGYQTWYADSVKGRFTISR<br>RDNAKNTVYLLQMNSLKPEDTAVYYCNVKDAGNSKALYDYWGQGTQVTVS    |
| 57 | QVQLVESGGGLVQAGGSLRLSCAASGFPVEHDMHWYRQAPGKEREWVAAIVSQGAYTVYADSVKGRFTISR<br>DNAKNTVYLLQMNSLKPEDTAVYYCNVKDWGRAGARYDYWGQGTQVTVS      |
| 58 | QVQLVESGGGLVQAGGSLRLSCAASGFPVDAAWMEWYRQAPGKEREWVAAITSYGYRTYYADSVKGRFTISR<br>DNAKNTVYLLQMNSLKPEDTAVYYCNVKMDRWRRTTYDYWGQGTQVTVS     |
| 60 | QVQLVESGGGLVQAGGSLRLSCAASGFPVVAWQMTWYRQAPGKEREWVAAIRSFGVSTHYADSVKGRFTISR<br>DNAKNTVYLLQMNSLKPEDTAVYYCNVKDWGYEYEGYDYWGQGTQVTVS     |
| 61 | QVQLVESGGGLVQAGGSLRLSCAASGFPVQHEWMEWYRQAPGKEREWVAAITSYGYRTYYADSVKGRFTISR<br>DNAKNTVYLLQMNSLKPEDTAVYYCNVKDTGTYYQAWYDYWGQGTQVTVS    |
| 62 | QVQLVESGGGLVQAGGSLRLSCAASGFPVEQEHMYWYRQASGKEREWVAAIVSEGAYTAYADSVKGRFTISR<br>DNAKNTVYLLQMNSLKPEDTAVYYCNVKDWGGYQWYDYWGQGTQVTVS      |
| 63 | QVQLVESGGGLVQAGGSLRLSCAASGFPVNAEIMFWYRQAPGKEREWVAAIKSAGTTTLYADSVKGRFTISR<br>DNAKNTVYLLQMNSLKPEDTAVYYCNVKDYGAQAHYDYWGQGTQVTVS      |
| 64 | QVQLVESGGGLVQAGGSLRLSCAASGFPVYNRYMLWYRQAPGKEREWVAAITSYGYHTTYADSVKGRFTISR<br>DNAKNTVYLLQMNSLKPEDTAVYYCNVKDYGQHQQVYDYWGQGTQVTVS     |
| 66 | QVQLVESGGGLVQAGGSLRLSCAASGFPVENTWMEWYRQAPGKEREWVAAITSYGYRTYYADSVKGRFTISR<br>DNAKNTVYLLQMNSLKPEDTAVYYCNVKDEGSQSWAYDYWGQGTQVTVS     |
| 67 | QVQLVESGGGLVQAGGSLRLSCAASGFPVMAHMAWYRQAPGKEREWVAAIVSAGAYTHYADSVKGRFTISR<br>RDNAKNTVYLLQMNSLKPEDTAVYYCNVKDWGTYSYDYWGQGTQVTVS       |
| 68 | QVQLVESGGGSVQAGGSLRLSCAASGTITNIGYLGWFRQAPGKEREGVAALKTYDGYTYADSVKGRFTVSLDN<br>AKNTVYLLQMNSLKPEDTALYCAAARHGRDEPLSYMYYSYWGQGTQVTVS   |
| 69 | QVQLVESGGGSVQAGGSLRLSCAASGYISEISYLGWFRQAPGKEREGVAALITGWGHTTYADSVKGRFTVSLDN<br>AKNTVYLLQMNSLKPEDTALYCAAQAQTGAWYPLETYIYHYWGQGTQVTVS |
| 71 | QVQLVESGGGSVQAGGSLRLSCAASGNIQHIKYLWFRQAPGREREGVAALMTRYGQTYADSVKGRFTVSLD<br>NAKNTVYLLQMNSLKPEDTALYCAAHYGDNFPLAYQAYLYWGQGTQVTVS     |
| 73 | QVQLVESGGGSVQAGGSLRLSCAASGKIYQIGYLGWFRQAPGKEREGVAALMTTDGYTYADSVKGRFTVSLD<br>NAKNTVYLLQMNSLKPEDTALYCAAARHGRRERPLHYWYYSYWGQGTQVTVS  |
| 75 | QVQLVESGGGSVQAGGSLRLSCAASGYINQIYLGWFRQAPGKEREGVAALNTYQGQTYADSVKGRFTVSLD<br>NAKNTVYLLQMNSLKPEDTALYCAAARWGRDEPLYHYYSYWGQGTQVTVS     |
| 76 | QVQLVESGGGLVQAGGSLRLSCAASSFPVDTYHMAWYRQAPGKEREWVAAIVSWGWRYYADSVKGRFTISR<br>DNAKNTVYLLQMNSLKPEDTAVYYCNVKDIGAQEVHYDYWGQGTQVTVS      |
| 77 | QVQLVESGGGSVQAGGSLRLSCAASGSISSITYLGWFRQAPAKSVRAVAALDTEQGETYYADSVKGRFTVSLDNA<br>KNTVYLLQMNSLKPEDTALYCAAANQHGGYPLDSAWYTYWGQGTQVTVS  |
| 78 | QVQLVESGGGSVQAGGSLRLSCAASGYIKSIKYLWFRQAPGKEREGVAALMTRYGETYYADSVKGRFTVSLDN<br>AKNTVYLLQMNSLKPEDTALYCAAANYGNWPLTGVNYWYWGQGTQVTVS    |

|     |                                                                                                                                  |
|-----|----------------------------------------------------------------------------------------------------------------------------------|
| 79  | QVQLVESGGGSVQAGGSLRLSCAASGYIHTIEYLGWFRQAPGKEREGVAALYTLKGQTYADSVKGRFTVSLDN<br>AKNTVYQLQMNSLKPEDTALYCAAARWGRDTPHYYQYYSYWGQGTQVTVS  |
| 81  | QVQLVESGGGSVQAGGSLRLSCAASGYIHRIEYLGWFRQAPGKEREGVAALSTISGNTYYADSVKGRFTVSLDNA<br>KNTVYQLQMNSLKPEDTALYCAAARFGRAYPLHYYQTYWYGQGTQVTVS |
| 82  | QVQLVESGGGSVQAGGSLRLSCAASGTINSIHLYLGWFRQAPGKEREGVAALDITYGYTYADSVKGRFTVSLDNA<br>KNTVYQLQMNSLKPEDTALYCAAARWGRTSPLHWYTYWYGQGTQVTVS  |
| 83  | QVQLVESGGGSVQAGGSLRLSCAASGGITHIYLGWFRQAPGKEREGVAALMTRWGTYYADSVKGRFTVSLD<br>NAKNTVYQLQMNSLKPEDTALYCAAAYGQNFPLSYHAYRYWYGQGTQVTVS   |
| 84  | QVQLVESGGGSVQAGGSLRLSCAASGYIKHIEYLGWFRQAPGKEREGVAALKTSSGSTYYADSVKGRFTVSLDNA<br>KNTVYQLQMNSLKPEDTALYCAAARYGRSDPLHYHEYSYWGQGTQVTVS |
| 85  | QVQLVESGGGSVQAGGSLRLSCAASGSISSITYLGWFRQAPGKEREGVAALVTSRGKTYADSVKGRFTVSLDNA<br>KNTVYQLQMNSLKPEDTALYCAAASWGYTWPLYTYDYWYWGQGTQVTVS  |
| 86  | QVQLVESGGGSVQAGGSLRLSCAASGTIASIYLGWFRQAPGKEREGVAALNTWNGKTYADSVKGRFTVSLDN<br>AKNTVYQLQMNSLKPEDTALYCAAAYSWMWYPLSNEHYGYWGQGTQVTVS   |
| 88  | QVQLVESGGGLVQAGGSLRLSCAASGFPVWAHMLWYRQAPGKEREWVAIASWGANTAYADSVKGRFTIS<br>RDNKNTVYQLQMNSLKPEDTAVYYCNVKDSGQYRENYDYWGQGTQVTVS       |
| 90  | QVQLVESGGGSVQAGGSLRLSCAASGAINQIYLGWFRQAPGKEREGVAALSTKYGETYYADSVKGRFTVSLDN<br>AKNTVYQLQMNSLKPEDTALYCAAARWGRQYPLTFVYYSYWGQGTQVTVS  |
| 93  | QVQLVESGGGSVQAGGSLRLSCAASGHIAQIEYLGWFRQAPGKEREGVAALSTNQGYTYADSVKGRFTVSLDN<br>AKNTVYQLQMNSLKPEDTALYCAAARWGRTYPLSYMAYTYWGQGTQVTVS  |
| 94  | QVQLVESGGGSVQAGGSLRLSCAASGYITMIEYLGWFRQAPGKEREGVAALNHTGGTYADSVKGRFTVSLD<br>NAKNTVYQLQMNSLKPEDTALYCAAARWGRYEPLHYAYYSYWGQGTQVTVS   |
| 95  | QVQLVESGGGSVQAGGSLRLSCAASGNIYNIKYLWFRQAPGKEREGVAALMTRYGETYYADSVKGRFTVSLDN<br>AKNTVYQLQMNSLKPEDTALYCAAASYGANWPLVSAAYTYWGQGTQVTVS  |
| 97  | QVQLVESGGGSVQAGGSLRLSCAASGAISTIEYLGWFRQAPGREREGVAALYTERGYTYADSVKGRFTVSLDNA<br>KNTVYQLQMNSLKPEDTALYCAAARYGHAQAPLHYFWYGYWGQGTQVTVS |
| 100 | QVQLVESGGGSVQAGGSLRLSCAASGSISSITYLGWFRQAPGKEREGVAALVTS DGRTYADSVKGRFTVSLDNA<br>KNTVYQLQMNSLKPEDTALYCAAANWGYSWPLYQTEYWYWGQGTQVTVS |
